# Supplementary material for: Favorable effect of ripasudil use on surgical outcomes of microhook ab interno trabeculotomy
Source: Springer Nature journal article supplement (doi:10.1007/s00417-023-06040-1), 2023-03-31
Supplement: MOESM1 [file 25193292]

Supplemental Table 1. Patient demographics of the study population before propensity score matching

|                                                   |              |       | Ripasudil users<br>n=125 |                 | Ripasudil nonusers<br>n=93 |                 | p value  |
|---------------------------------------------------|--------------|-------|--------------------------|-----------------|----------------------------|-----------------|----------|
| Age, yrs                                          | median (IQR) |       | 70.0                     | (60, 76)        | 69.0                       | (60, 75)        | 0.72†    |
| Male                                              | n (%)        |       | 70                       | (56)            | 47                         | (51)            | 0.42*    |
| Glaucoma type                                     | POAG         | n (%) | 53                       | (42)            | 51                         | (55)            | 0.07*    |
|                                                   | XFG          | n (%) | 20                       | (16)            | 21                         | (23)            | 0.22*    |
|                                                   | Steroid G    | n (%) | 14                       | (11)            | 1                          | (1)             | <0.01‡   |
|                                                   | Others       | n (%) | 38                       | (30)            | 20                         | (22)            | 0.14*    |
| Preoperative IOP, mmHg                            | median (IQR) |       | 28.0                     | (22.0, 35.0)    | 25.0                       | (21.0, 29.0)    | <0.01†   |
| Preoperative glaucoma drug score                  | median (IQR) |       | 5.0                      | (5.0, 6.0)      | 4.0                        | (3.0, 5.0)      | <0.0001† |
| Preoperative HVF MD value, dB                     | median (IQR) |       | -11.37                   | (-18.75, -4.90) | -11.63                     | (-16.68, -7.15) | 0.63†    |
| Preoperative logMAR visual acuity                 | median (IQR) |       | 0.00                     | (-0.08, 0.22)   | 0.00                       | (-0.08, 0.22)   | 0.93†    |
| Preoperative ECD, cells/mm <sup>2</sup>           | median (IQR) |       | 2577                     | (2222, 2878)    | 2591                       | (2354, 2795)    | 0.89†    |
| Combined cataract surgery                         | n (%)        |       | 49                       | (39)            | 47                         | (51)            | 0.10*    |
| Incision range (1quadrant)                        | n (%)        |       | 105                      | (84)            | 81                         | (87)            | 0.52*    |
| Overall duration of glaucoma medical therapy, yrs | median (IQR) |       | 4.6                      | (1.0, 10.8)     | 5.4                        | (1.5, 11.0)     | 0.46†    |
| Antithrombotic drug use                           | n (%)        |       | 19                       | (15)            | 14                         | (15)            | 0.98*    |

IQR, Interquartile range; POAG, Primary open angle glaucoma; XFG, Exfoliation glaucoma; Steroid G, Steroid-induced glaucoma; IOP, intraocular pressure; HVF: Humphrey visual field; MD, Mean deviation; ECD, corneal endothelial density; 1-quadrant, the patient who had 120° incision of trabecular meshwork; \*, Chi-squared test; †, Mann–Whitney U test; ‡, Fisher’s exact test
