# Supplementary material for: Favorable effect of ripasudil use on surgical outcomes of microhook ab interno trabeculotomy
Source: Springer Nature journal article supplement (doi:10.1007/s00417-023-06040-1), 2023-03-31
Supplement: MOESM2 [file 25193292]

Supplemental Table 2. Comparison of surgical outcomes with and without ripasudil use one year after surgery.

|                         | Postoperative Users (n=38) | Postoperative Nonusers (n=76) | p value |
|-------------------------|----------------------------|-------------------------------|---------|
| Surgical Success, n (%) | 22 (58)                    | 49 (64)                       | 0.50*   |

(\* , Chi-squared test)
