# Supplementary material for: Favorable effect of ripasudil use on surgical outcomes of microhook ab interno trabeculotomy
Source: Springer Nature journal article supplement (doi:10.1007/s00417-023-06040-1), 2023-03-31
Supplement: MOESM3 [file 25193292]

Supplemental Table 3. Comparison of postoperative glaucoma medications except for ripasudil in preoperative ripasudil users and nonusers.

|                                  |       | Ripasudil users<br>n=57 |       | Ripasudil nonusers<br>n=57 |       | p value |
|----------------------------------|-------|-------------------------|-------|----------------------------|-------|---------|
| Prostanoid receptor analogs      | n (%) | 47                      | (82)  | 52                         | (91)  | 0.17*   |
| $\beta$ -blockers                | n (%) | 41                      | (72)  | 44                         | (77)  | 0.52*   |
| Carbonic anhydrase inhibitors    | n (%) | 39                      | (68)  | 43                         | (75)  | 0.41*   |
| $\alpha$ 2 adrenergic agonist    | n (%) | 28                      | (49)  | 26                         | (46)  | 0.71*   |
| $\alpha$ 1 adrenergic antagonist | n (%) | 0                       | (0)   | 2                          | (4)   | 0.50†   |
| Ion-channel opener               | n (%) | 0                       | (0)   | 0                          | (0)   | 1.00†   |
| Parasympathomimetic ※            | n (%) | 57                      | (100) | 57                         | (100) | 1.00*   |
| Acetazolamide                    | n (%) | 4                       | (7)   | 12                         | (21)  | 0.06†   |

※ Our institution uses parasympathomimetic for about 1 month postoperatively in all cases to prevent peripheral anterior synechia formation.

(\* , Chi-squared test; †, Fisher's exact test)
